# Supplementary material
Source: MDPI journal article supplement (https://www.mdpi.com/2071-1050/14/22/14679)
Supplement: s1 [file s1]

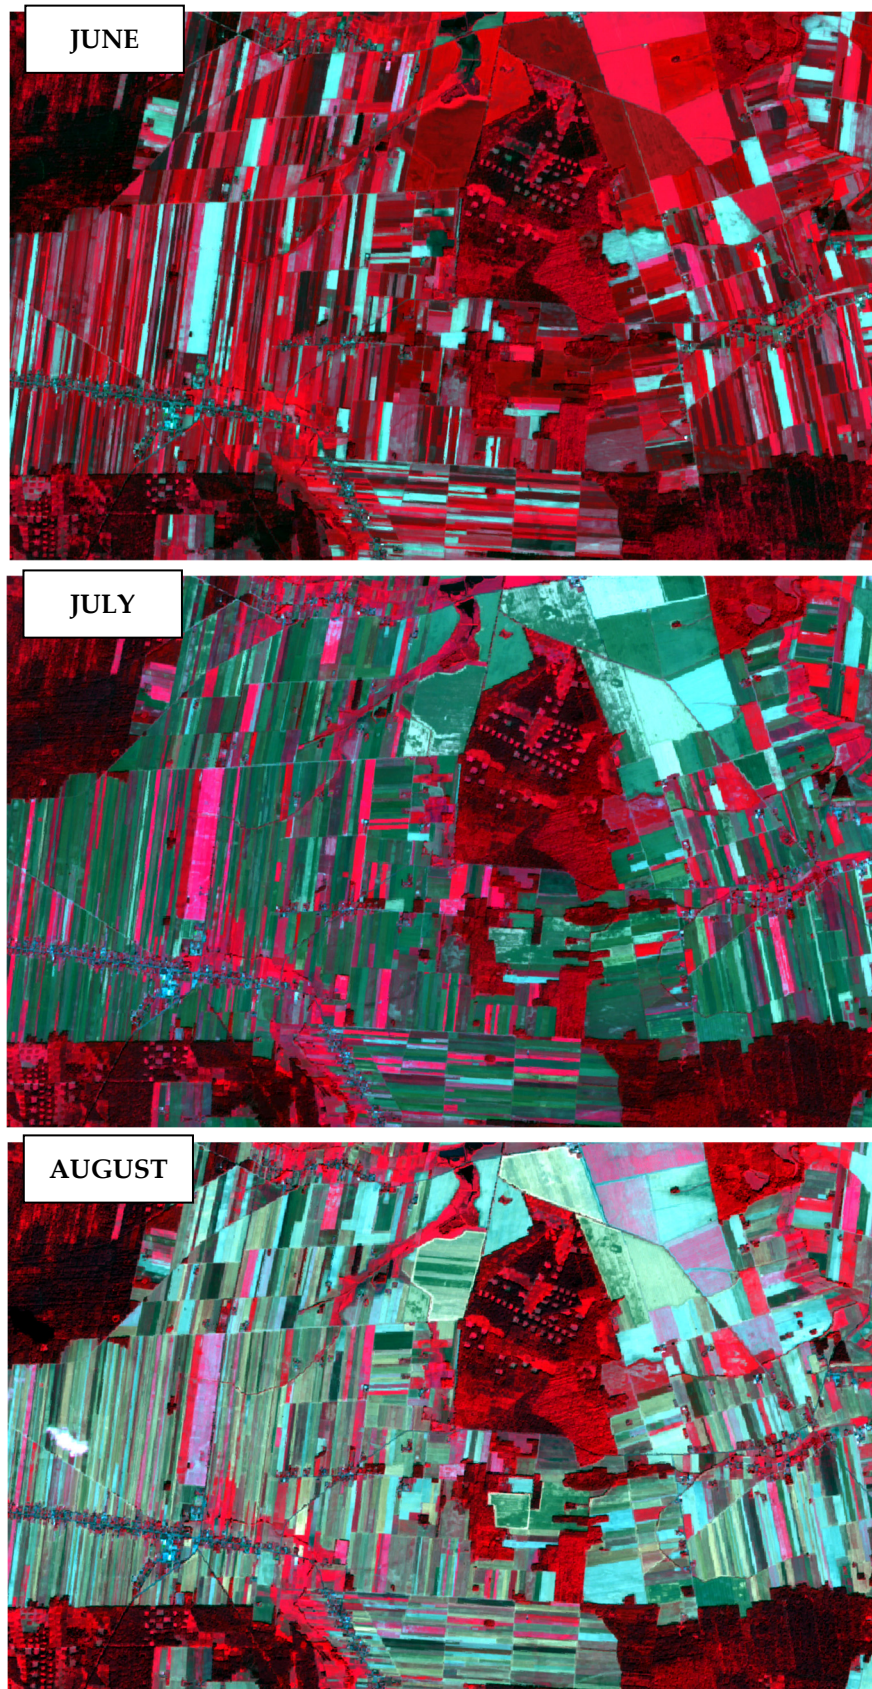

**Figure S1.** Satellite images presenting the dynamics of crops in three consecutive months in infrared: June (plant development in the green phase), July (matured grain fields without chlorophyll), and August (mostly bare soil is visible).

**Table S1.** A number of GPS records for each animal in selected months: \* individuals killed during the study.

| Animal ID    | Sex | Age (years) | June       | July       | August     | September  | Total        |
|--------------|-----|-------------|------------|------------|------------|------------|--------------|
| GIGA04       | F   | 1           |            | 118        | 118        |            | 236          |
| GIGA06       | M   | 4           |            | 141        | 116        |            | 257          |
| GIGA10       | M   | 6           |            |            | 121        |            | 121          |
| GIGA12       | M   | 8           | 41         | 48         | 58         | 44         | 191          |
| GIGA17       | M   | 3           | 104        | 101        | 85         | 67         | 357          |
| GIGA25*      | F   | 1           | 54         | 49         | 57         | 59         | 219          |
| GIGA26       | F   | 4           | 85         | 88         | 74         | 46         | 293          |
| GIGA27*      | F   | 2           | 212        | 46         |            |            | 258          |
| GIGA28*      | F   | 2           | 59         | 72         | 77         | 24         | 232          |
| GIGA30*      | F   | 4           | 107        | 93         | 87         | 45         | 332          |
| <b>Total</b> |     |             | <b>662</b> | <b>756</b> | <b>793</b> | <b>285</b> | <b>2,496</b> |

**Table S2.** Satellite imagery used for the analysis of land cover Biała Podlaska powiat and Piaseczno powiat in subsequent months of the summer period 2020.

| Powiat         | Date       | Nr of imagery                                 |
|----------------|------------|-----------------------------------------------|
| Piaseczno      | 01.06.2020 | L2A_T34UDC_A025816_20200601T095036_2020-06-01 |
|                | 01.06.2020 | L2A_T34UEC_A025816_20200601T095036_2020-06-01 |
|                | 28.06.2020 | L2A_T34UDC_A026202_20200628T094036_2020-06-28 |
|                | 28.06.2020 | L2A_T34UEC_A026202_20200628T094036_2020-06-28 |
|                | 01.07.2020 | L2A_T34UDC_A026245_20200701T095501_2020-07-01 |
|                | 01.07.2020 | L2A_T34UEC_A026245_20200701T095501_2020-07-01 |
|                | 26.07.2020 | L2A_T34UDC_A017694_20200726T095032_2020-07-26 |
|                | 26.07.2020 | L2A_T34UEC_A017694_20200726T095032_2020-07-26 |
|                | 15.08.2020 | L2A_T34UDC_A017980_20200815T095033_2020-08-15 |
|                | 15.08.2020 | L2A_T34UEC_A017980_20200815T095033_2020-08-15 |
|                | 14.09.2020 | L2A_T34UDC_A018409_20200914T095031_2020-09-14 |
|                | 14.09.2020 | L2A_T34UEC_A018409_20200914T095031_2020-09-14 |
| Biała Podlaska | 08.06.2020 | L2A_T34UFC_A025916_20200608T094037_2020-06-08 |
|                | 05.07.2020 | L2A_T34UFC_A026302_20200705T093039_2020-07-05 |
|                | 25.07.2020 | L2A_T34UFC_A026588_20200725T093039_2020-07-25 |
|                | 14.08.2020 | L2A_T34UFC_A026874_20200814T093040_2020-08-14 |

**Table S3.** Model selection (A) and Parameter estimates (B) of wild boar presence locations and random points.

**Table S3A.** Ranking of the models (including null model) predicting the presence of wild boar in given habitats ( $\Delta AIC$ — $AIC$  differences;  $\omega_i$ —Akaike weights; Rank—rank of the models based on  $AIC_c$  values); variables: see methods.

| Model                                  | $\Delta AIC$ | $\omega_i$  | Rank     |
|----------------------------------------|--------------|-------------|----------|
| <b>MONTH + HABITAT + MONTH*HABITAT</b> | <b>0.00</b>  | <b>1.00</b> | <b>1</b> |
| HABITAT                                | 155.98       | 0.00        | 2        |
| MONTH + HABITAT                        | 160.64       | 0.00        | 3        |
| Null model                             | 240.09       | 0.00        | 4        |
| MONTH                                  | 246.05       | 0.00        | 5        |

**Table S3B.** Parameter estimates of the generalized linear binary model; 0\*- reference value. Full model:  $\chi^2=278.094$ ,  $df=19$ ,  $p<0.001$ .

|                                     | B      | St. Error | $\chi^2$ | p      | Exp (B) | Lower CI | Upper CI |
|-------------------------------------|--------|-----------|----------|--------|---------|----------|----------|
| Intercept                           | -0.769 | 0.2775    | 7.680    | 0.006  | 0.463   | 0.269    | 0.798    |
| HABITAT (forests)                   | 0.959  | 0.3073    | 9.748    | 0.002  | 2.610   | 1.429    | 4.767    |
| HABITAT (pastures)                  | 0.340  | 0.3425    | 0.983    | 0.321  | 1.404   | 0.718    | 2.748    |
| HABITAT (mosaics)                   | 1.020  | 0.5753    | 3.146    | 0.076  | 2.774   | 0.898    | 8.568    |
| HABITAT (arable)                    | 1.099  | 0.3223    | 11.624   | <0.001 | 3.001   | 1.595    | 5.644    |
| HABITAT (other)                     | 0*     |           |          |        |         |          |          |
| MONTH (June)                        | -0.962 | 0.4096    | 7.493    | 0.006  | 3.069   | 1.375    | 6.850    |
| MONTH (July)                        | -0.112 | 0.5206    | 27.072   | <0.001 | 15.012  | 5.411    | 41.649   |
| MONTH (August)                      | 1.115  | 0.8516    | 0.080    | 0.777  | 1.272   | 0.240    | 6.752    |
| MONTH (September)                   | 0*     |           |          |        |         |          |          |
| MONTH (June)*HABITAT (forests)      | 1.121  | 0.4096    | 7.493    | 0.006  | 3.069   | 1.375    | 6.850    |
| MONTH (July)*HABITAT (forests)      | -0.020 | 0.3415    | 0.003    | 0.954  | 0.980   | 0.502    | 1.915    |
| MONTH (August)*HABITAT (forests)    | -1.193 | 0.3601    | 10.977   | <0.001 | 0.303   | 0.150    | 0.614    |
| MONTH (September)*HABITAT (forests) | 0*     |           |          |        |         |          |          |
| MONTH (June)*HABITAT (pastures)     | 2.709  | 0.5206    | 27.072   | <0.001 | 15.012  | 5.411    | 41.649   |
| MONTH (July)*HABITAT (pastures)     | -0.357 | 0.5127    | 0.484    | 0.486  | 0.700   | 0.256    | 1.912    |

|                                      |        |        |        |        |       |       |       |
|--------------------------------------|--------|--------|--------|--------|-------|-------|-------|
| MONTH (August)*HABITAT (pastures)    | -0.411 | 0.4394 | 0.877  | 0.349  | 0.663 | 0.280 | 1.568 |
| MONTH (September)*HABITAT (pastures) | 0*     |        |        |        |       |       |       |
| MONTH (June)*HABITAT (arable)        | 0.013  | 0.4278 | 0.001  | 0.976  | 1.013 | 0.438 | 2.343 |
| MONTH (July)*HABITAT (arable)        | 0.315  | 0.3643 | 0.747  | 0.387  | 1.370 | 0.671 | 2.798 |
| MONTH (August)*HABITAT (arable)      | -1.740 | 0.3759 | 21.421 | <0.001 | 0.176 | 0.084 | 0.367 |
| MONTH (September)*HABITAT (arable)   | 0*     |        |        |        |       |       |       |
| MONTH (June)*HABITAT (mosaics)       | 0.241  | 0.8516 | 0.080  | 0.777  | 1.272 | 0.240 | 6.752 |
| MONTH (July)*HABITAT (mosaics)       | -0.050 | 0.6391 | 0.006  | 0.937  | 0.951 | 0.272 | 3.328 |
| MONTH (August)*HABITAT (mosaics)     | -1.353 | 0.6220 | 4.735  | 0.030  | 0.258 | 0.076 | 0.874 |
| MONTH (September)*HABITAT (mosaics)  | 0*     |        |        |        |       |       |       |
| MONTH (June)*HABITAT (other)         | 0*     |        |        |        |       |       |       |
| MONTH (July)*HABITAT (other)         | 0*     |        |        |        |       |       |       |
| MONTH (August)*HABITAT (other)       | 0*     |        |        |        |       |       |       |
| MONTH (September)*HABITAT (other)    | 0*     |        |        |        |       |       |       |

---
